# Supplementary material for: Allergenic Activity of Individual Cat Allergen Molecules
Source: MDPI journal article supplement (doi:10.3390/ijms242316729), 2023-11-24
Supplement: s1 [file s1]

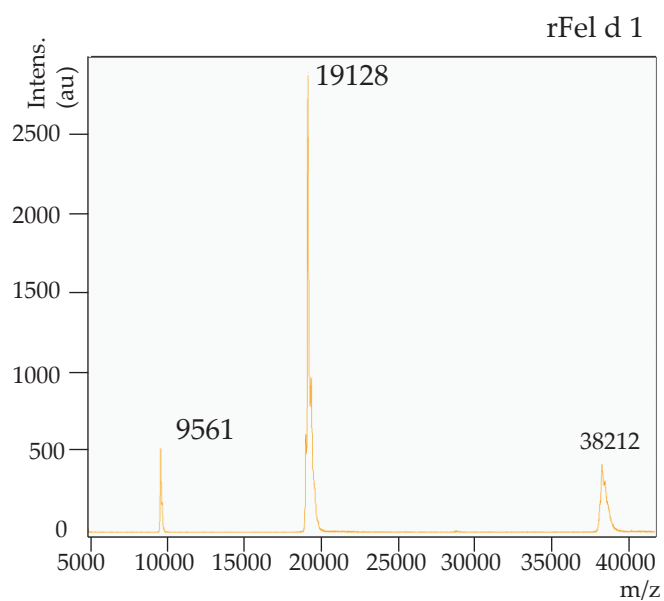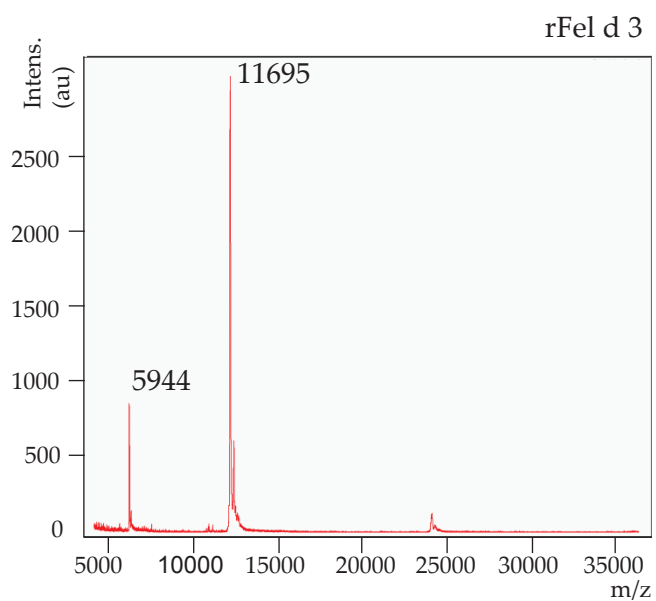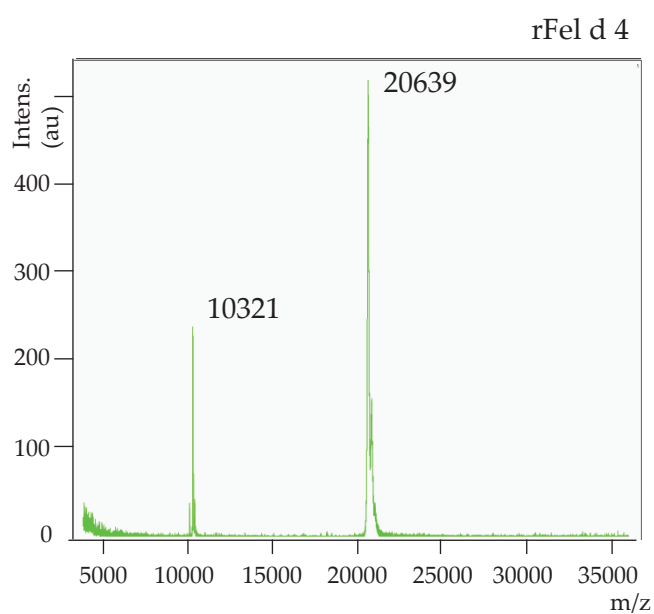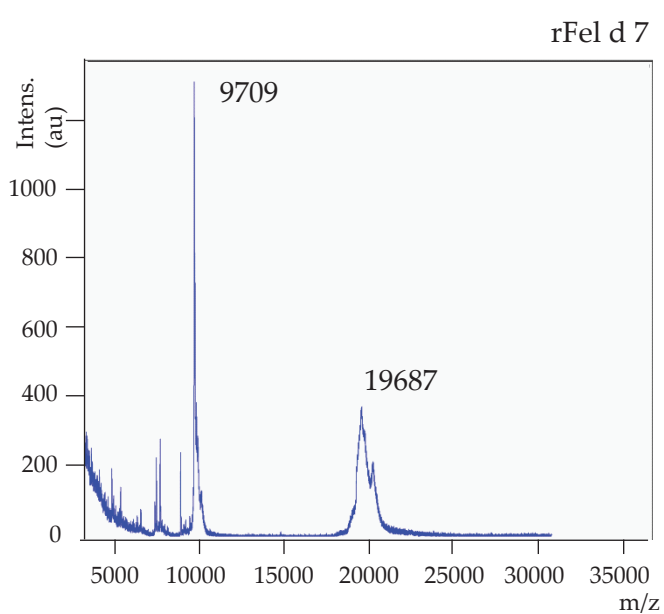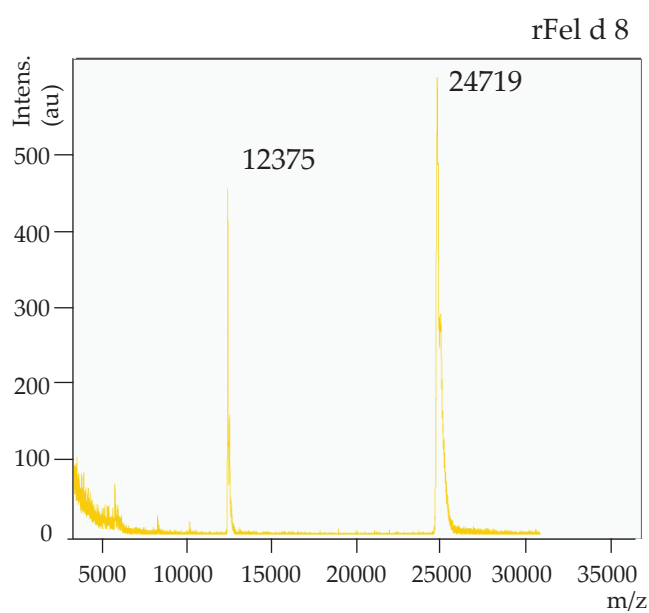

Figure S1. Mass spectrometry of cat allergens Fel d 1-8. Molecular mass was determined by matrix-assisted laser desorption/ionization time-of-flight mass spectrometry. Shown are signal intensities (y-axes) for the masses (x-axes).
