# Supplementary material for: Allergenic Activity of Individual Cat Allergen Molecules
Source: MDPI journal article supplement (doi:10.3390/ijms242316729), 2023-11-24
Supplement: s1 [file s1]

Table S1. Demographic, serological and clinical characteristics of cat-sensitized patients and their IgE reactivity profiles to individual cat allergen molecules

| Patients |     |     | ImmunoCAP      | Cat related symptoms |        |          |       |         | Other allergy |       |        |       | ImmunoCAP (kUA/L) |         |         |         |         |         |         |         | Sum Fel d | Total IgE | % of total |         |         |         |         |         |         |  |
|----------|-----|-----|----------------|----------------------|--------|----------|-------|---------|---------------|-------|--------|-------|-------------------|---------|---------|---------|---------|---------|---------|---------|-----------|-----------|------------|---------|---------|---------|---------|---------|---------|--|
| #        | Sex | Age | IgE (e1) kUA/L | respiratory          | asthma | rhinitis | conj. | dermat. | dust          | pet   | pollen | food* | Fel d 1           | Fel d 2 | Fel d 3 | Fel d 4 | Fel d 6 | Fel d 7 | Fel d 8 | Sum     | 1+4+7     |           | Fel d 1    | Fel d 2 | Fel d 3 | Fel d 4 | Fel d 6 | Fel d 7 | Fel d 8 |  |
| 1        | 1   | 12  | 11.00          | 1                    | 0      | 1        | n.d.  | n.d.    | n.d.          | 1,2   | 1      | 1     | 13.30             | 0.00    | 0.76    | 2.50    | 0.00    | 0.79    | 1.06    | 18.41   | 16.59     | 324.44    | 4.10       | 0.00    | 0.23    | 0.77    | 0.00    | 0.24    | 0.33    |  |
| 2        | 1   | 10  | 0.39           | 0                    | 0      | 0        | n.d.  | n.d.    | n.d.          | 1,2   | 1      | 0     | 0.56              | 0.01    | 0.00    | 0.01    | 0.01    | 0.00    | 0.01    | 0.60    | 0.57      | 402.93    | 0.14       | 0.00    | 0.00    | 0.00    | 0.00    | 0.00    | 0.00    |  |
| 3        | 1   | 16  | 6.20           | 1                    | 1      | 1        | n.d.  | n.d.    | n.d.          | 1,2   | 1      | 1     | 7.70              | 0.04    | 0.07    | 0.08    | 0.04    | 0.24    | 0.04    | 8.21    | 8.02      | 593.26    | 1.30       | 0.01    | 0.01    | 0.01    | 0.01    | 0.04    | 0.01    |  |
| 4        | 2   | 16  | 7.40           | 1                    | 0      | 1        | n.d.  | n.d.    | n.d.          | 1     | 1      | 1     | 8.83              | 0.02    | 0.30    | 2.35    | 0.03    | 1.60    | 0.78    | 13.91   | 12.78     | 712.24    | 1.24       | 0.00    | 0.04    | 0.33    | 0.00    | 0.22    | 0.11    |  |
| 5        | 1   | 12  | 57.00          | 1                    | 1      | 1        | n.d.  | n.d.    | n.d.          | 1,2   | 1      | 1     | 72.10             | 0.04    | 1.36    | 12.40   | 0.10    | 0.03    | 3.17    | 89.20   | 84.53     | 946.99    | 7.61       | 0.00    | 0.14    | 1.31    | 0.01    | 0.00    | 0.33    |  |
| 6        | 1   | 14  | 0.19           | 0                    | 0      | 0        | n.d.  | n.d.    | n.d.          | 1     | 1      | 1     | 0.00              | 0.00    | 0.00    | 0.00    | 0.00    | 0.08    | 0.00    | 0.08    | 0.08      | 180.05    | 0.00       | 0.00    | 0.00    | 0.00    | 0.00    | 0.04    | 0.00    |  |
| 7        | 2   | 10  | 6.20           | 1                    | 0      | 1        | n.d.  | n.d.    | n.d.          | 1,2,3 | 1      | 1     | 0.01              | 0.78    | 1.48    | 17.70   | 0.04    | 22.20   | 2.97    | 45.18   | 39.91     | 528.58    | 0.00       | 0.15    | 0.28    | 3.35    | 0.01    | 4.20    | 0.56    |  |
| 8        | 1   | 12  | 0.76           | 0                    | 0      | 0        | n.d.  | n.d.    | n.d.          | 1     | 1      | 0     | 1.16              | 0.00    | 0.00    | 0.00    | 0.00    | 0.00    | 0.00    | 1.16    | 1.16      | 40.83     | 2.84       | 0.00    | 0.00    | 0.00    | 0.00    | 0.00    | 0.00    |  |
| 9        | 1   | 10  | 48.00          | 1                    | 0      | 1        | n.d.  | n.d.    | n.d.          | 1     | 1      | 0     | 59.10             | 0.01    | 0.01    | 0.01    | 0.02    | 0.01    | 0.01    | 59.17   | 59.12     | 417.35    | 14.16      | 0.00    | 0.00    | 0.00    | 0.00    | 0.00    | 0.00    |  |
| 10       | 1   | 15  | 2.70           | 1                    | 1      | 1        | n.d.  | n.d.    | n.d.          | 1     | 0      | 0     | 0.27              | 0.00    | 0.18    | 3.44    | 0.43    | 5.50    | 0.34    | 10.16   | 9.21      | 197.46    | 0.14       | 0.00    | 0.09    | 1.74    | 0.22    | 2.79    | 0.17    |  |
| 11       | 1   | 10  | 13.00          | 1                    | 0      | 1        | n.d.  | n.d.    | n.d.          | 1     | 1      | 1     | 21.50             | 0.06    | 0.05    | 0.32    | 0.05    | 0.56    | 0.09    | 22.63   | 22.38     | 777.48    | 2.77       | 0.01    | 0.01    | 0.04    | 0.01    | 0.07    | 0.01    |  |
| 12       | 1   | 15  | 9.50           | 0                    | 0      | 0        | n.d.  | n.d.    | n.d.          | 1,3   | 1      | 1     | 8.43              | 0.78    | 0.39    | 1.20    | 0.03    | 5.29    | 0.68    | 16.80   | 14.92     | 503.64    | 1.67       | 0.15    | 0.08    | 0.24    | 0.01    | 1.05    | 0.14    |  |
| 13       | 2   | 16  | 19.00          | 1                    | 1      | 1        | n.d.  | n.d.    | n.d.          | 1,2   | 1      | 1     | 24.00             | 0.05    | 1.75    | 4.01    | 0.07    | 0.03    | 2.73    | 32.64   | 28.04     | 730.35    | 3.29       | 0.01    | 0.24    | 0.55    | 0.01    | 0.00    | 0.37    |  |
| 14       | 2   | 14  | 2.10           | 1                    | 1      | 0        | n.d.  | n.d.    | n.d.          | 1     | 1      | 1     | 0.33              | 0.23    | 0.23    | 0.39    | 0.04    | 0.03    | 0.33    | 1.58    | 0.75      | 1354.60   | 0.02       | 0.02    | 0.02    | 0.03    | 0.00    | 0.00    | 0.02    |  |
| 15       | 1   | 12  | 2.80           | 0                    | 0      | 0        | n.d.  | n.d.    | n.d.          | 1     | 1      | 0     | 0.03              | 2.45    | 1.10    | 8.04    | 0.04    | 0.35    | 2.14    | 14.15   | 8.42      | 520.79    | 0.01       | 0.47    | 0.21    | 1.54    | 0.01    | 0.07    | 0.41    |  |
| 16       | 1   | 10  | 11.00          | 0                    | 0      | 0        | n.d.  | n.d.    | n.d.          | 1     | 1      | 1     | 0.09              | 0.05    | 0.39    | 12.90   | 0.05    | 52.50   | 0.94    | 66.92   | 65.49     | 898.63    | 0.01       | 0.01    | 0.04    | 1.44    | 0.01    | 5.84    | 0.10    |  |
| 17       | 2   | 16  | 4.40           | 1                    | 1      | 1        | n.d.  | n.d.    | n.d.          | 1     | 1      | 0     | 8.82              | 0.00    | 0.00    | 0.01    | 0.00    | 0.00    | 0.00    | 8.83    | 8.83      | 197.87    | 4.46       | 0.00    | 0.00    | 0.01    | 0.00    | 0.00    | 0.00    |  |
| 18       | 1   | 15  | 2.20           | 0                    | 0      | 0        | n.d.  | n.d.    | n.d.          | 1,2   | 1      | 1     | 2.66              | 0.00    | 0.08    | 0.26    | 0.00    | 0.11    | 0.12    | 3.23    | 3.03      | 181.06    | 1.47       | 0.00    | 0.04    | 0.14    | 0.00    | 0.06    | 0.07    |  |
| 19       | 2   | 14  | 7.20           | 0                    | 0      | 0        | n.d.  | n.d.    | n.d.          | 1,2   | 0      | 0     | 0.02              | 0.00    | 4.12    | 9.52    | 0.00    | 1.41    | 6.48    | 21.55   | 10.95     | 257.34    | 0.01       | 0.00    | 1.60    | 3.70    | 0.00    | 0.55    | 2.52    |  |
| 20       | 2   | 10  | 0.67           | 0                    | 0      | 0        | n.d.  | n.d.    | n.d.          | 1     | 0      | 0     | 0.00              | 0.00    | 0.00    | 0.00    | 0.00    | 0.00    | 0.00    | 0.00    | 0.00      | 262.15    | 0.00       | 0.00    | 0.00    | 0.00    | 0.00    | 0.00    | 0.00    |  |
| 21       | 1   | 10  | 1.40           | 1                    | 0      | 1        | n.d.  | n.d.    | n.d.          | 0     | 1      | 0     | 2.75              | 0.03    | 0.02    | 0.03    | 0.16    | 0.02    | 0.04    | 3.05    | 2.80      | 781.19    | 0.35       | 0.00    | 0.00    | 0.00    | 0.02    | 0.00    | 0.01    |  |
| 22       | 1   | 12  | 11.00          | 1                    | 0      | 1        | n.d.  | n.d.    | n.d.          | 1,2   | 1      | 1     | 26.00             | 0.32    | 0.07    | 0.51    | 0.01    | 0.50    | 0.17    | 27.58   | 27.01     | 414.42    | 6.27       | 0.08    | 0.02    | 0.12    | 0.00    | 0.12    | 0.04    |  |
| 23       | 1   | 12  | 47.00          | 0                    | 0      | 0        | n.d.  | n.d.    | n.d.          | 0     | 0      | 0     | 57.10             | 0.00    | 2.09    | 6.36    | 0.01    | 0.00    | 4.08    | 69.64   | 63.46     | 144.23    | 39.59      | 0.00    | 1.45    | 4.41    | 0.01    | 0.00    | 2.83    |  |
| 24       | 2   | 11  | 120.00         | 1                    | 1      | 1        | n.d.  | n.d.    | n.d.          | 1,2   | 0      | 0     | 136.00            | 0.00    | 0.02    | 0.01    | 0.01    | 5.54    | 0.01    | 141.59  | 141.55    | 250.35    | 54.32      | 0.00    | 0.01    | 0.00    | 0.00    | 2.21    | 0.00    |  |
| 25       | 1   | 11  | 7.70           | 1                    | 0      | 1        | n.d.  | n.d.    | n.d.          | 1,3   | 1      | 1     | 13.20             | 0.04    | 0.06    | 1.34    | 0.03    | 2.98    | 0.18    | 17.83   | 17.52     | 755.63    | 1.75       | 0.01    | 0.01    | 0.18    | 0.00    | 0.39    | 0.02    |  |
| 26       | 2   | 12  | 39.00          | 1                    | 0      | 1        | n.d.  | n.d.    | n.d.          | 1,2,3 | 1      | 1     | 48.30             | 0.03    | 0.87    | 1.45    | 0.05    | 22.30   | 1.52    | 74.52   | 72.05     | 502.10    | 9.62       | 0.01    | 0.17    | 0.29    | 0.01    | 4.44    | 0.30    |  |
| 27       | 1   | 11  | 840.00         | 1                    | 0      | 1        | n.d.  | n.d.    | n.d.          | 1,2   | 1      | 1     | 751.00            | 45.80   | 30.00   | 314.00  | 28.40   | 546.00  | 54.88   | 1770.08 | 1611.00   | 2698.17   | 27.83      | 1.70    | 1.11    | 11.64   | 1.05    | 20.24   | 2.03    |  |
| 28       | 1   | 15  | 12.00          | 1                    | 0      | 1        | n.d.  | n.d.    | n.d.          | 1     | 1      | 1     | 17.70             | 0.00    | 0.01    | 0.23    | 0.00    | 0.00    | 0.03    | 17.97   | 17.93     | 168.84    | 10.48      | 0.00    | 0.01    | 0.14    | 0.00    | 0.00    | 0.02    |  |
| 29       | 1   | 15  | 590.00         | 1                    | 0      | 1        | n.d.  | n.d.    | n.d.          | 1,2   | 1      | 0     | 342.00            | 446.00  | 9.35    | 67.50   | 30.40   | 83.80   | 16.90   | 995.95  | 493.30    | 1365.01   | 25.05      | 32.67   | 0.68    | 4.95    | 2.23    | 6.14    | 1.24    |  |
| 30       | 2   | 13  | 12.00          | 0                    | 0      | 0        | n.d.  | n.d.    | n.d.          | 1,2   | 1      | 1     | 15.50             | 0.09    | 0.09    | 0.45    | 0.11    | 0.32    | 0.12    | 16.68   | 16.27     | 2482.53   | 0.62       | 0.00    | 0.00    | 0.02    | 0.00    | 0.01    | 0.00    |  |
| 31       | 2   | 16  | 0.63           | 0                    | 0      | 0        | n.d.  | n.d.    | n.d.          | 0     | 1      | 1     | 1.03              | 0.11    | 0.11    | 0.11    | 0.13    | 0.07    | 0.14    | 1.70    | 1.21      | 3592.90   | 0.03       | 0.00    | 0.00    | 0.00    | 0.00    | 0.00    | 0.00    |  |
| 32       | 2   | 11  | 52.00          | 0                    | 0      | 0        | n.d.  | n.d.    | n.d.          | 1     | 1      | 0     | 101.50            | 0.01    | 0.00    | 0.01    | 0.02    | 4.78    | 0.01    | 106.33  | 106.29    | 360.47    | 28.16      | 0.00    | 0.00    | 0.00    | 0.01    | 1.33    | 0.00    |  |
| 33       | 2   | 15  | 5.60           | 1                    | 0      | 1        | n.d.  | n.d.    | n.d.          | 1,2   | 1      | 0     | 7.27              | 0.00    | 0.00    | 0.00    | 0.00    | 0.12    | 0.00    | 7.39    | 7.39      | 46.89     | 15.50      | 0.00    | 0.00    | 0.00    | 0.00    | 0.26    | 0.00    |  |
| 34       | 1   | 13  | 49.00          | 1                    | 0      | 1        | n.d.  | n.d.    | n.d.          | 2     | 1      | 0     | 81.20             | 0.04    | 0.03    | 0.17    | 0.03    | 10.70   | 0.06    | 92.23   | 92.07     | 778.28    | 10.43      | 0.01    | 0.00    | 0.02    | 0.00    | 1.37    | 0.01    |  |
| 35       | 1   | 16  | 7.70           | 1                    | 1      | 1        | n.d.  | n.d.    | n.d.          | 1,2,3 | 1      | 0     | 10.90             | 0.02    | 0.02    | 0.02    | 0.10    | 0.94    | 0.02    | 12.02   | 11.86     | 282.48    |            |         |         |         |         |         |         |  |
