# Supplementary material for: Allergenic Activity of Individual Cat Allergen Molecules
Source: MDPI journal article supplement (doi:10.3390/ijms242316729), 2023-11-24
Supplement: s1 [file s1]

Table S2. Demographic and clinical characteristics of subjects from control groups.

| Non-allergic subjects |                           |                              |               |     |             |              |            |
|-----------------------|---------------------------|------------------------------|---------------|-----|-------------|--------------|------------|
|                       |                           |                              | Other allergy |     |             |              |            |
| #                     | Sex                       | Age                          | HDM           | Pet | Tree pollen | Grass pollen | Mold/Latex |
| 1                     | m                         | 25                           | no            | no  | no          | no           | no         |
| 2                     | m                         | 35                           | no            | no  | no          | no           | no         |
| 3                     | m                         | 30                           | no            | no  | no          | no           | no         |
| 4                     | m                         | 42                           | no            | no  | no          | no           | no         |
| 5                     | m                         | 26                           | no            | no  | no          | no           | no         |
| 6                     | m                         | 35                           | no            | no  | no          | no           | no         |
| 7                     | f                         | 30                           | no            | no  | no          | no           | no         |
| 8                     | m                         | 40                           | no            | no  | no          | no           | no         |
| 9                     | f                         | 26                           | no            | no  | no          | no           | no         |
| 10                    | m                         | 30                           | no            | no  | no          | no           | no         |
| 11                    | f                         | 42                           | no            | no  | no          | no           | no         |
|                       | Male to female ratio: 8/3 | Mean (min-max): 32.8 (25-42) | 0             | 0   | 0           | 0            | 0          |

  

| Allergic patients without cat allergy |                           |                              |               |     |             |              |            |
|---------------------------------------|---------------------------|------------------------------|---------------|-----|-------------|--------------|------------|
|                                       |                           |                              | Other allergy |     |             |              |            |
| #                                     | Sex                       | Age                          | HDM           | Pet | Tree pollen | Grass pollen | Mold/Latex |
| 12                                    | m                         | 40                           | yes           | no  | no          | yes          | no         |
| 13                                    | f                         | 42                           | yes           | no  | yes         | no           | no         |
| 14                                    | f                         | 39                           | no            | no  | no          | yes          | no         |
| 15                                    | m                         | 25                           | no            | no  | yes         | yes          | no         |
| 16                                    | m                         | 22                           | no            | no  | yes         | yes          | yes        |
| 17                                    | f                         | 33                           | yes           | no  | no          | no           | no         |
| 18                                    | f                         | 22                           | no            | no  | yes         | yes          | no         |
| 19                                    | m                         | 30                           | yes           | no  | no          | no           | no         |
| 20                                    | m                         | 18                           | no            | no  | no          | yes          | yes        |
|                                       | Male to female ratio: 4/5 | Mean (min-max): 30.1 (18-42) | 4             | 0   | 4           | 6            | 2          |
