# Supplementary material for: Allergenic Activity of Individual Cat Allergen Molecules
Source: MDPI journal article supplement (doi:10.3390/ijms242316729), 2023-11-24
Supplement: s1 [file s1]

Table S3. Average percentages of beta-hexosaminidase release after stimulation with 10ng/ml of each of the cat allergens in cat-sensitized subjects, non-allergic subjects and allergic subjects without cat allergy.

| Cat-sensitized children |         |         |         |         |         |         |         |
|-------------------------|---------|---------|---------|---------|---------|---------|---------|
|                         | Fel d 1 | Fel d 2 | Fel d 3 | Fel d 4 | Fel d 6 | Fel d 7 | Fel d 8 |
| #51                     | 11      | 0       | 1       | 0       | 1       | 2       | 2       |
| #10                     | 6       | 2       | 0       | 2       | 0       | 6       | 1       |
| #56                     | 74      | 53      | 63      | 78      | 38      | 66      | 60      |
| #4                      | 46      | 0       | 0       | 0       | 0       | 0       | 0       |
| #7                      | 0       | 0       | 9       | 31      | 0       | 42      | 6       |
| #29                     | 70      | 66      | 20      | 65      | 16      | 69      | 28      |
| #23                     | 71      | 0       | 0       | 9       | 2       | 4       | 3       |
| #54                     | 28      | 1       | 1       | 26      | 4       | 5       | 1       |
| #5                      | 34      | 0       | 0       | 17      | 0       | 0       | 0       |
| #24                     | 46      | 0       | 0       | 0       | 0       | 9       | 0       |
| #13                     | 61      | 0       | 2       | 11      | 0       | 0       | 1       |
| #36                     | 63      | 0       | 0       | 2       | 2       | 39      | 1.6     |
| #27                     | 67      | 45      | 47      | 59      | 9       | 38      | 25      |
| #26                     | 81      | 0       | 0       | 0       | 0       | 63      | 0       |
| #34                     | 17      | 0       | 0       | 0       | 0       | 12      | 0       |
| #12                     | 54      | 2       | 0       | 2       | 1       | 0       | 3       |
| #16                     | 0       | 0       | 0       | 16      | 0       | 67      | 0       |

| Non-allergic subjects |         |         |         |         |         |         |         |
|-----------------------|---------|---------|---------|---------|---------|---------|---------|
|                       | Fel d 1 | Fel d 2 | Fel d 3 | Fel d 4 | Fel d 6 | Fel d 7 | Fel d 8 |
| NA1                   | 0       | 0       | 0       | 0       | 0       | 0       | 0       |
| NA2                   | 0       | 0       | 0       | 0       | 0       | 0       | 0       |
| NA3                   | 0       | 0       | 0       | 0       | 0       | 0       | 0       |
| NA4                   | 0       | 0       | 0       | 0       | 0       | 0       | 0       |
| NA5                   | 0       | 0       | 0       | 0       | 0       | 0       | 0       |
| NA6                   | 0       | 2       | 4       | 0       | 0       | 0       | 0       |
| NA7                   | 0       | 0       | 0       | 0       | 0       | 0       | 0       |
| NA8                   | 0       | 0       | 0       | 0       | 0       | 0       | 0       |
| NA9                   | 0       | 0       | 0       | 0       | 0       | 0       | 0       |
| NA10                  | 0       | 0       | 0       | 0       | 0       | 0       | 0       |
| NA11                  | 0       | 0       | 0       | 0       | 0       | 0       | 0       |

| Allergic subjects without cat allergy |         |         |         |         |         |         |         |
|---------------------------------------|---------|---------|---------|---------|---------|---------|---------|
|                                       | Fel d 1 | Fel d 2 | Fel d 3 | Fel d 4 | Fel d 6 | Fel d 7 | Fel d 8 |
| NA12                                  | 0       | 0       | 0       | 0       | 0       | 0       | 0       |
| NA13                                  | 0       | 0       | 0       | 0       | 0       | 7       | 0       |
| NA14                                  | 1       | 0       | 0       | 0       | 0       | 0       | 0       |
| NA15                                  | 0       | 0       | 0       | 0       | 0       | 0       | 0       |
| NA16                                  | 0       | 0       | 0       | 0       | 0       | 0       | 0       |
| NA17                                  | 0       | 0       | 0       | 0       | 0       | 0       | 0       |

|      |   |   |   |   |   |   |   |
|------|---|---|---|---|---|---|---|
| NA18 | 0 | 0 | 0 | 0 | 0 | 0 | 0 |
| NA19 | 0 | 0 | 0 | 0 | 0 | 0 | 0 |
| NA20 | 0 | 0 | 0 | 0 | 0 | 0 | 0 |
